# Supplementary material for: Bladder cancer-derived exosomal KRT6B promotes invasion and metastasis by inducing EMT and regulating the immune microenvironment
Source: J Transl Med. 2022 Jul 6;20:308. doi: 10.1186/s12967-022-03508-2 (PMC9258227; doi:10.1186/s12967-022-03508-2)
Supplement: Supplementary file 5 — Additional file 5: Table S5. Mean expression level of KRT6B. [file 12967_2022_3508_MOESM5_ESM.xlsx]

## Sheet: Sheet1
Mean expression level of KRT6B
	mRNA (2^-ΔCT)		Protein (Relative Value to GAPDH)
	N	T	N	T
#1	0.009935	0.017059	0.58741	1.31265
#2	0.000628	0.030325	0.459342	0.983292
#3	0.010896	0.013888	0.411117	0.662869
#4	0.008974	0.01323	0.745259	1.3598
#5	0.016554	0.088388	1.12303	1.33787
#6	0.001268	0.0115556	0.527106	1.19044
#7	0.009442	0.034996	0.635354	1.8941
#8	0.000393	0.041907	1.33069	2.06963
#9	0.10949	0.546726	1.07739	1.23073
#10	0.0119	0.010027	1.28119	0.592974
#11	0.075386	0.347219	0.70993	1.55115
#12	0.000611	0.005301	1.8098	2.61979
#13	0.011787	0.006524	5.10944	2.31606
#14	0.006592	0.306536	1.94926	2.05645
#15	0.084275	0.217014	1.09347	1.62777
#16	0.040219	0.207121	1.59967	2.62688
